# Supplementary material
Source: ML conference proceedings conference paper supplement (https://proceedings.mlr.press/v119/zhu20f.html)
Supplement: Supplementary file [file zhu20f-supp.pdf]

---

## Supplementary material for the paper: ”Linear Convergence of Randomized Primal-Dual Coordinate Method for Large-scale Linear Constrained Convex Programming”

---

First of all, we have the following observations:

In algorithm RPDC, the indices  $i(k)$ ,  $k = 0, 1, 2, \dots$  are random variables. After  $k$  iterations, RPDC method generates a random output  $(u^{k+1}, p^{k+1})$ . Recall the definition of filtration  $\mathcal{F}_k$  which is generated by the random variable  $i(0), i(1), \dots, i(k)$ , i.e.,

$$\mathcal{F}_k \stackrel{def}{=} \{i(0), i(1), \dots, i(k)\}, \mathcal{F}_k \subset \mathcal{F}_{k+1}.$$

Additionally,  $\mathcal{F} = (\mathcal{F}_k)_{k \in \mathbb{N}}$ ,  $\mathbb{E}_{\mathcal{F}_{k+1}} = \mathbb{E}(\cdot | \mathcal{F}_k)$  is the conditional expectation w.r.t.  $\mathcal{F}_k$  and the conditional expectation in term of  $i(k)$  given  $i(0), i(1), \dots, i(k-1)$  as  $\mathbb{E}_{i(k)}$ .

Knowing  $\mathcal{F}_{k-1} = \{i(0), i(1), \dots, i(k-1)\}$ , we have:

$$\mathbb{E}_{i(k)} \langle \nabla_{i(k)} G(u^k), (u^k - u)_{i(k)} \rangle = \frac{1}{N} \langle \nabla G(u^k), u^k - u \rangle \geq \frac{1}{N} [G(u^k) - G(u)], \quad (\text{A.1})$$

$$\mathbb{E}_{i(k)} [J_{i(k)}(u_{i(k)}^k) - J_{i(k)}(u_{i(k)})] = \frac{1}{N} [J(u^k) - J(u)], \quad (\text{A.2})$$

and

$$\mathbb{E}_{i(k)} \langle q^k, A_{i(k)}(u^k - u)_{i(k)} \rangle = \frac{1}{N} \langle q^k, A(u^k - u) \rangle. \quad (\text{A.3})$$

Secondly, reconsidering the point  $T(w^k) = (T_u(w^k), T_p(w^k))$  generated by one deterministic iteration of APP-AL (Cohen & Zhu, 1984) for given  $w^k$ ,

**APP-AL**

$$\begin{cases} T_u(w^k) = \arg \min_{u \in \mathbf{U}} \langle \nabla G(u^k), u \rangle + J(u) + \langle q^k, Au \rangle + \frac{1}{\epsilon} D(u, u^k); \\ T_p(w^k) = p^k + \gamma [AT_u(w^k) - b], \end{cases}$$

with  $q^k = p^k + \gamma(Au^k - b)$ , we have the following observations. The convex combination of  $u^k$  and  $T_u(w^k)$  provides the expected value of  $u^{k+1}$  as following.

$$\mathbb{E}_{i(k)} u^{k+1} = \frac{1}{N} T_u(w^k) + (1 - \frac{1}{N}) u^k, \quad (\text{A.4})$$

or

$$T_u(w^k) = N \mathbb{E}_{i(k)} u^{k+1} - (N-1) u^k. \quad (\text{A.5})$$

Moreover, the point  $T(w^k)$  satisfies that: for any  $(u, p) \in \mathbf{U} \times \mathbf{R}^m$ ,

$$\begin{cases} \langle \nabla G(u^k), u - T_u(w^k) \rangle + J(u) - J(T_u(w^k)) + \langle q^k, A(u - T_u(w^k)) \rangle \\ \quad + \frac{1}{\epsilon} \langle \nabla K(T_u(w^k)) - \nabla K(u^k), u - T_u(w^k) \rangle \geq 0, \\ \gamma [AT_u(w^k) - b] = T_p(w^k) - p^k. \end{cases} \quad (\text{A.6})$$

## 1. Proof of Lemma 1

*Proof.* Take  $w' = w^*$  in (9), we have that

$$\begin{aligned}
 \Lambda(w, w^*) &= D(u^*, u) + \frac{\epsilon}{2N\rho} \|p - p^*\|^2 + \frac{\epsilon(N-1)}{N} [L(u, p) - L(u^*, p^*)] + \frac{\epsilon(N-2)\gamma}{2N} \|Au - b\|^2 \\
 &= D(u^*, u) + \frac{\epsilon}{2N\rho} \|p - p^*\|^2 + \frac{\epsilon(N-1)}{N} [L(u, p^*) - L(u^*, p^*)] + \frac{\epsilon(N-1)}{N} \langle p - p^*, Au - b \rangle \\
 &\quad + \frac{\epsilon(N-2)\gamma}{2N} \|Au - b\|^2.
 \end{aligned} \tag{A.7}$$

(i) Since  $L(u, p^*) - L(u^*, p^*) \geq 0$  and  $\frac{1}{2\gamma} \|p - p^*\|^2 + \frac{\gamma}{2} \|Au - b\|^2 + \langle p - p^*, Au - b \rangle \geq 0$ , (A.7) follows that

$$\Lambda(w, w^*) \geq D(u^*, u) + \frac{\epsilon}{2N\rho} \|p - p^*\|^2 - \frac{\epsilon(N-1)}{2N\gamma} \|p - p^*\|^2 - \frac{\epsilon\gamma}{2N} \|Au - b\|^2.$$

From Assumption 2, we have  $D(u^*, u) \geq \frac{\beta}{2} \|u - u^*\|^2$ . Together with the fact  $Au^* = b$  and  $\rho < \frac{2\gamma}{2N-1}$ , above inequality follows that

$$\Lambda(w, w^*) \geq d_1 \|w - w^*\|^2,$$

$$\text{with } d_1 = \min \left\{ \frac{1}{2N} [N\beta - \epsilon\gamma\lambda_{\max}(A^\top A)], \frac{\epsilon}{4N\gamma} \right\}.$$

(ii) By Young's inequality, (A.7) follows that

$$\begin{aligned}
 \Lambda(w, w^*) &\leq D(u^*, u) + \frac{\epsilon}{2N\rho} \|p - p^*\|^2 + \frac{\epsilon(N-1)}{N} [L(u, p^*) - L(u^*, p^*)] \\
 &\quad + \frac{\epsilon(N-1)}{N} \left[ \frac{1}{2\gamma} \|p - p^*\|^2 + \frac{\gamma}{2} \|Au - b\|^2 \right] + \frac{\epsilon(N-2)\gamma}{2N} \|Au - b\|^2.
 \end{aligned}$$

From Assumption 2, we have  $D(u^*, u) \leq \frac{B}{2} \|u - u^*\|^2$ . Together with the fact  $Au^* = b$  and  $2\gamma > (2N-1)\rho$ , above inequality follows that

$$\Lambda(w, w^*) \leq d_2 \|w - w^*\|^2 + \frac{\epsilon(N-1)}{N} [L(u, p^*) - L(u^*, p^*)],$$

$$\text{with } d_2 = \max \left\{ \frac{(4N-3)\epsilon}{(4N-2)N\rho}, \frac{NB + \epsilon(2N-3)\gamma\lambda_{\max}(A^\top A)}{2N} \right\}.$$

(iii) By the definition of  $\Lambda(w, w')$ , we have

$$\begin{aligned}
 \Lambda(w, w') &\geq \frac{\epsilon(N-1)}{N} [L(u, p) - L(u^*, p^*)] + \frac{\epsilon(N-2)\gamma}{2N} \|Au - b\|^2 \\
 &= \frac{\epsilon(N-1)}{N} [L(u, p) - L(u, p^*)] + \frac{\epsilon(N-1)}{N} [L(u, p^*) - L(u^*, p^*)] + \frac{\epsilon(N-2)\gamma}{2N} \|Au - b\|^2 \\
 &\geq \frac{\epsilon(N-1)}{N} [L(u, p) - L(u, p^*)] + \frac{\epsilon(N-2)\gamma}{2N} \|Au - b\|^2 \\
 &= \frac{\epsilon(N-1)}{N} \langle p - p^*, Au - b \rangle + \frac{\epsilon(N-2)\gamma}{2N} \|Au - b\|^2 \\
 &\geq -d_3 \|p - p^*\|^2,
 \end{aligned} \tag{A.8}$$

$$\text{with } d_3 = \frac{\epsilon(N-1)^2}{2\gamma N(N-2)}.$$

□

## 2. Proof of Lemma 2

*Proof.* Step 1: Estimate  $\frac{\epsilon}{N} \mathbb{E}_{i(k)} [L(u^{k+1}, q^k) - L(u, q^k)]$ ;

For all  $u \in \mathbf{U}$ , the unique solution  $u^{k+1}$  of the primal problem of RPDC is characterized by the following variational inequality:

$$\begin{aligned} \langle \nabla_{i(k)} G(u^k), (u^{k+1} - u)_{i(k)} \rangle + J_{i(k)}(u_{i(k)}^{k+1}) - J_{i(k)}(u_{i(k)}) + \langle q^k, A_{i(k)}(u^{k+1} - u)_{i(k)} \rangle \\ + \frac{1}{\epsilon} \langle \nabla K(u^{k+1}) - \nabla K(u^k), u^{k+1} - u \rangle \leq 0, \end{aligned}$$

which follows that

$$\begin{aligned} \langle \nabla_{i(k)} G(u^k), (u^k - u - (u^k - u^{k+1}))_{i(k)} \rangle + J_{i(k)}(u_{i(k)}^k) - J_{i(k)}(u_{i(k)}) - (J_{i(k)}(u_{i(k)}^k) - J_{i(k)}(u_{i(k)}^{k+1})) \\ + \langle q^k, A_{i(k)}(u^k - u - (u^k - u^{k+1}))_{i(k)} \rangle + \frac{1}{\epsilon} \langle \nabla K(u^{k+1}) - \nabla K(u^k), u^{k+1} - u \rangle \leq 0. \end{aligned} \quad (\text{A.9})$$

Observing that for any separable mapping  $\psi(u) = \sum_{i=1}^N \psi_i(u_i)$ , we have  $\psi_{i(k)}(u_{i(k)}^k) - \psi_{i(k)}(u_{i(k)}^{k+1}) = \psi(u^k) - \psi(u^{k+1})$ .

Therefore, (A.9) follows that

$$\begin{aligned} \langle \nabla_{i(k)} G(u^k), (u^k - u)_{i(k)} \rangle + J_{i(k)}(u_{i(k)}^k) - J_{i(k)}(u_{i(k)}) + \langle q^k, A_{i(k)}(u^k - u)_{i(k)} \rangle \\ \leq \langle \nabla G(u^k), u^k - u^{k+1} \rangle + J(u^k) - J(u^{k+1}) + \langle q^k, A(u^k - u^{k+1}) \rangle \\ + \frac{1}{\epsilon} \langle \nabla K(u^{k+1}) - \nabla K(u^k), u - u^{k+1} \rangle. \end{aligned} \quad (\text{A.10})$$

Taking expectation with respect to  $i(k)$  on both side of (A.10), together the condition expectation (A.1)-(A.3), we get

$$\begin{aligned} \frac{1}{N} [L(u^k, q^k) - L(u, q^k)] \leq \mathbb{E}_{i(k)} \left\{ \langle \nabla G(u^k), u^k - u^{k+1} \rangle + J(u^k) - J(u^{k+1}) \right. \\ \left. + \langle q^k, A(u^k - u^{k+1}) \rangle + \frac{1}{\epsilon} \langle \nabla K(u^{k+1}) - \nabla K(u^k), u - u^{k+1} \rangle \right\}. \end{aligned} \quad (\text{A.11})$$

or

$$\begin{aligned} \frac{1}{N} \mathbb{E}_{i(k)} [L(u^{k+1}, q^k) - L(u, q^k)] \leq \mathbb{E}_{i(k)} \left\{ \underbrace{\langle \nabla G(u^k), u^k - u^{k+1} \rangle + J(u^k) - J(u^{k+1})}_{\alpha_1} \right. \\ \left. + \langle q^k, A(u^k - u^{k+1}) \rangle + \frac{1}{N} [L(u^{k+1}, q^k) - L(u^k, q^k)] \right. \\ \left. + \underbrace{\frac{1}{\epsilon} \langle \nabla K(u^{k+1}) - \nabla K(u^k), u - u^{k+1} \rangle}_{\alpha_2} \right\}. \end{aligned} \quad (\text{A.12})$$

By the gradient Lipschitz of  $G$ , term  $\alpha_1$  in (A.12) is bounded by

$$\alpha_1 = \langle \nabla G(u^k), u^k - u^{k+1} \rangle \leq G(u^k) - G(u^{k+1}) + \frac{B_G}{2} \|u^k - u^{k+1}\|^2. \quad (\text{A.13})$$

The simple algebraic operation and Assumption 2 follows that

$$\begin{aligned} \alpha_2 = \frac{1}{\epsilon} \langle \nabla K(u^{k+1}) - \nabla K(u^k), u - u^{k+1} \rangle &= \frac{1}{\epsilon} [D(u, u^k) - D(u, u^{k+1}) - D(u^{k+1}, u^k)] \\ &\leq \frac{1}{\epsilon} [D(u, u^k) - D(u, u^{k+1})] - \frac{\beta}{2\epsilon} \|u^k - u^{k+1}\|^2. \end{aligned} \quad (\text{A.14})$$

Combining (A.12)-(A.14), we obtain that

$$\begin{aligned} \frac{\epsilon}{N} \mathbb{E}_{i(k)} [L(u^{k+1}, q^k) - L(u, q^k)] \leq [D(u, u^k) - \mathbb{E}_{i(k)} D(u, u^{k+1})] + \mathbb{E}_{i(k)} \left\{ \frac{\epsilon(N-1)}{N} \underbrace{[L(u^k, q^k) - L(u^{k+1}, q^k)]}_{\alpha_3} \right. \\ \left. - \frac{\beta - \epsilon B_G}{2} \|u^k - u^{k+1}\|^2 \right\} \end{aligned} \quad (\text{A.15})$$

Since  $p^{k+1} = p^k + \rho(Au^{k+1} - b)$  and  $q^k = p^k + \gamma(Au^k - b)$ , term  $\alpha_3$  in (A.15) follows that

$$\begin{aligned}
 \alpha_3 &= L(u^k, q^k) - L(u^{k+1}, q^k) \\
 &= L(u^k, p^k) - L(u^{k+1}, p^{k+1}) + \langle q^k - p^k, Au^k - b \rangle + \langle p^{k+1} - q^k, Au^{k+1} - b \rangle \\
 &= L(u^k, p^k) - L(u^{k+1}, p^{k+1}) + \gamma \|Au^k - b\|^2 + \rho \|Au^{k+1} - b\|^2 - \gamma \langle Au^k - b, Au^{k+1} - b \rangle \\
 &= L(u^k, p^k) - L(u^{k+1}, p^{k+1}) + \frac{\gamma}{2} \|Au^k - b\|^2 + (\rho - \frac{\gamma}{2}) \|Au^{k+1} - b\|^2 + \frac{\gamma}{2} \|A(u^k - u^{k+1})\|^2 \\
 &\leq L(u^k, p^k) - L(u^{k+1}, p^{k+1}) + \frac{\gamma}{2} \|Au^k - b\|^2 + (\rho - \frac{\gamma}{2}) \|Au^{k+1} - b\|^2 \\
 &\quad + \frac{\gamma \lambda_{\max}(A^\top A)}{2} \|u^k - u^{k+1}\|^2.
 \end{aligned} \tag{A.16}$$

Combining (A.15)-(A.16), we have that

$$\begin{aligned}
 \frac{\epsilon}{N} \mathbb{E}_{i(k)} [L(u^{k+1}, q^k) - L(u, q^k)] &\leq [D(u, u^k) - \mathbb{E}_{i(k)} D(u, u^{k+1})] + \mathbb{E}_{i(k)} \left\{ \frac{\epsilon(N-1)}{N} [L(u^k, p^k) - L(u^{k+1}, p^{k+1})] \right. \\
 &\quad - \frac{\beta - \epsilon[B_G + \frac{N-1}{N} \gamma \lambda_{\max}(A^\top A)]}{2} \|u^k - u^{k+1}\|^2 + \frac{\epsilon \gamma (N-1)}{2N} \|Au^k - b\|^2 \\
 &\quad \left. + \frac{\epsilon(2\rho - \gamma)(N-1)}{2N} \|Au^{k+1} - b\|^2 \right\}
 \end{aligned} \tag{A.17}$$

**Step 2: Estimate**  $\frac{\epsilon}{N} \mathbb{E}_{i(k)} [L(u^{k+1}, p) - L(u^{k+1}, q^k)]$

$$\begin{aligned}
 L(u^{k+1}, p) - L(u^{k+1}, q^k) &= \langle p - q^k, Au^{k+1} - b \rangle \\
 &= \frac{1}{\rho} \langle p - p^k, p^{k+1} - p^k \rangle - \gamma \langle Au^k - b, Au^{k+1} - b \rangle \\
 &= \frac{1}{2\rho} [\|p - p^k\|^2 - \|p - p^{k+1}\|^2 + \|p^k - p^{k+1}\|^2] - \gamma \langle Au^k - b, Au^{k+1} - b \rangle \\
 &= \frac{1}{2\rho} [\|p - p^k\|^2 - \|p - p^{k+1}\|^2 + \|p^k - p^{k+1}\|^2] + \frac{\gamma}{2} \|A(u^k - u^{k+1})\|^2 \\
 &\quad - \frac{\gamma}{2} \|Au^k - b\|^2 - \frac{\gamma}{2} \|Au^{k+1} - b\|^2 \\
 &= \frac{1}{2\rho} [\|p - p^k\|^2 - \|p - p^{k+1}\|^2] + \frac{\gamma}{2} \|A(u^k - u^{k+1})\|^2 \\
 &\quad - \frac{\gamma}{2} \|Au^k - b\|^2 + \frac{\rho - \gamma}{2} \|Au^{k+1} - b\|^2 \quad (\text{since } p^{k+1} = p^k + \rho(Au^{k+1} - b).) \\
 &\leq \frac{1}{2\rho} [\|p - p^k\|^2 - \|p - p^{k+1}\|^2] + \frac{\gamma \lambda_{\max}(A^\top A)}{2} \|u^k - u^{k+1}\|^2 \\
 &\quad - \frac{\gamma}{2} \|Au^k - b\|^2 + \frac{\rho - \gamma}{2} \|Au^{k+1} - b\|^2
 \end{aligned} \tag{A.18}$$

Multiply  $\frac{\epsilon}{N}$  on both side of above inequality, we obtain that:  $\forall p \in \mathbf{R}^m$

$$\begin{aligned}
 \frac{\epsilon}{N} [L(u^{k+1}, p) - L(u^{k+1}, q^k)] &\leq \frac{\epsilon}{2N\rho} [\|p - p^k\|^2 - \|p - p^{k+1}\|^2] + \frac{\epsilon \frac{1}{N} \gamma \lambda_{\max}(A^\top A)}{2} \|u^k - u^{k+1}\|^2 \\
 &\quad - \frac{\epsilon \gamma}{2N} \|Au^k - b\|^2 + \frac{\epsilon(\rho - \gamma)}{2N} \|Au^{k+1} - b\|^2.
 \end{aligned} \tag{A.19}$$

Taking expectation with respect to  $i(k)$  on both side of inequality (A.19), we have

$$\begin{aligned}
 \frac{\epsilon}{N} \mathbb{E}_{i(k)} [L(u^{k+1}, p) - L(u^{k+1}, q^k)] &\leq \frac{\epsilon}{2N\rho} [\|p - p^k\|^2 - \mathbb{E}_{i(k)} \|p - p^{k+1}\|^2] + \frac{\epsilon \frac{1}{N} \gamma \lambda_{\max}(A^\top A)}{2} \mathbb{E}_{i(k)} \|u^k - u^{k+1}\|^2 \\
 &\quad - \frac{\epsilon \gamma}{2N} \|Au^k - b\|^2 + \frac{\epsilon(\rho - \gamma)}{2N} \mathbb{E}_{i(k)} \|Au^{k+1} - b\|^2.
 \end{aligned} \tag{A.20}$$

Step 3: Estimate the variance of  $\Lambda(w^k, w)$ .

Summing inequalities (A.17) and (A.20), with  $d_4 = \frac{\min \left\{ \frac{\beta - \epsilon[B_G + \gamma \lambda_{\max}(A^\top A)]}{2}, \frac{\epsilon[2\gamma - (2N-1)\rho]}{2N} \right\}}{\max\{N^2 + 2\gamma^2(N^2 + 2)\lambda_{\max}(A^\top A), 4\gamma^2\}}$ , we have that

$$\begin{aligned}
 & \Lambda(w^k, w) - \mathbb{E}_{i(k)}\Lambda(w^{k+1}, w) \\
 \geq & \mathbb{E}_{i(k)} \left\{ \frac{\epsilon}{N} [L(u^{k+1}, p) - L(u, q^k)] + \frac{\beta - \epsilon[B_G + \gamma \lambda_{\max}(A^\top A)]}{2} \|u^k - u^{k+1}\|^2 + \frac{\epsilon[2\gamma - (2N-1)\rho]}{2N} \|Au^{k+1} - b\|^2 \right\} \\
 \geq & \mathbb{E}_{i(k)} \left\{ \frac{\epsilon}{N} [L(u^{k+1}, p) - L(u, q^k)] + d_4 [(N^2 + 2\gamma^2(N^2 + 2)\lambda_{\max}(A^\top A)) \|u^k - u^{k+1}\|^2 + 4\gamma^2 \|Au^{k+1} - b\|^2] \right\} \\
 \geq & \mathbb{E}_{i(k)} \left\{ \frac{\epsilon}{N} [L(u^{k+1}, p) - L(u, q^k)] + d_4 [(1 + 2\gamma^2 \lambda_{\max}(A^\top A)) N^2 \|u^k - u^{k+1}\|^2 + 4\gamma^2 (\|A(u^k - u^{k+1})\|^2 + \|Au^{k+1} - b\|^2)] \right\} \\
 \geq & \mathbb{E}_{i(k)} \left\{ \frac{\epsilon}{N} [L(u^{k+1}, p) - L(u, q^k)] + d_4 [(1 + 2\gamma^2 \lambda_{\max}(A^\top A)) N^2 \|u^k - u^{k+1}\|^2 + 2\gamma^2 \|Au^k - b\|^2] \right\} \\
 = & \frac{\epsilon}{N} \mathbb{E}_{i(k)} [L(u^{k+1}, p) - L(u, q^k)] + d_4 [(1 + 2\gamma^2 \lambda_{\max}(A^\top A)) N^2 \mathbb{E}_{i(k)} \|u^k - u^{k+1}\|^2 + 2\gamma^2 \|Au^k - b\|^2]. \tag{A.21}
 \end{aligned}$$

By Jensen's inequality, (A.21) follows that

$$\begin{aligned}
 \Lambda(w^k, w) - \mathbb{E}_{i(k)}\Lambda(w^{k+1}, w) & \geq \frac{\epsilon}{N} \mathbb{E}_{i(k)} [L(u^{k+1}, p) - L(u, q^k)] \\
 & \quad + d_4 [(1 + 2\gamma^2 \lambda_{\max}(A^\top A)) N^2 \mathbb{E}_{i(k)} \|u^k - u^{k+1}\|^2 + 2\gamma^2 \|Au^k - b\|^2] \tag{A.22}
 \end{aligned}$$

Since  $\mathbb{E}_{i(k)} u^{k+1} - u^k = \frac{1}{N} [T_u(w^k) - u^k]$  in (A.4), (A.22) yields that

$$\begin{aligned}
 \Lambda(w^k, w) - \mathbb{E}_{i(k)}\Lambda(w^{k+1}, w) & \geq \frac{\epsilon}{N} \mathbb{E}_{i(k)} [L(u^{k+1}, p) - L(u, q^k)] \\
 & \quad + d_4 [(1 + 2\gamma^2 \lambda_{\max}(A^\top A)) \|u^k - T_u(w^k)\|^2 + 2\gamma^2 \|Au^k - b\|^2]. \tag{A.23}
 \end{aligned}$$

Since  $\lambda_{\max}(A^\top A) \|u^k - T_u(w^k)\|^2 \geq \|A[u^k - T_u(w^k)]\|^2$  and  $T_p(w^k) - p^k = \gamma[AT_u(w^k) - b]$ , (A.23) follows that

$$\begin{aligned}
 \Lambda(w^k, w) - \mathbb{E}_{i(k)}\Lambda(w^{k+1}, w) & \geq \frac{\epsilon}{N} \mathbb{E}_{i(k)} [L(u^{k+1}, p) - L(u, q^k)] \\
 & \quad + d_4 [\|u^k - T_u(w^k)\|^2 + 2\gamma^2 \|A[u^k - T_u(w^k)]\|^2 + 2\gamma^2 \|Au^k - b\|^2] \\
 & \geq \frac{\epsilon}{N} \mathbb{E}_{i(k)} [L(u^{k+1}, p) - L(u, q^k)] + d_4 [\|u^k - T_u(w^k)\|^2 + \gamma^2 \|AT_u(w^k) - b\|^2] \\
 & \geq \frac{\epsilon}{N} \mathbb{E}_{i(k)} [L(u^{k+1}, p) - L(u, q^k)] + d_4 \|w^k - T(w^k)\|^2.
 \end{aligned}$$

Then we have the result of Lemma 2. □

### 3. Proof of Theorem 1 (Almost surely convergence)

*Proof.*

(i) Take  $w = w^*$  in Lemma 2, we have

$$\Lambda(w^k, w^*) \geq \mathbb{E}_{i(k)} \Lambda(w^{k+1}, w^*) + \frac{\epsilon}{N} \mathbb{E}_{i(k)} [L(u^{k+1}, p^*) - L(u^*, q^k)] + d_4 \|w^k - T(w^k)\|^2. \quad (\text{A.24})$$

Observe that  $L(u^{k+1}, p^*) - L(u^*, q^k) \geq 0$ . From statement (i) of Lemma 1, we have that  $\Lambda(w^k, w^*)$  is nonnegative. By the Robbins-Siegmund Lemma (Robbins & Siegmund, 1971), we obtain that  $\lim_{k \rightarrow +\infty} \Lambda(w^k, w^*)$  almost surely exists,

$$\sum_{k=0}^{+\infty} \|w^k - T(w^k)\|^2 < +\infty \text{ a.s..}$$

(ii) Since  $\lim_{k \rightarrow +\infty} \Lambda(w^k, w^*)$  almost surely exists, thus  $\Lambda(w^k, w^*)$  is almost surely bounded. Thanks statement (i) of Lemma 1, it implies the sequences  $\{w^k\}$  is almost surely bounded.

(iii) From statement (i) we have that

$$\lim_{k \rightarrow \infty} \|w^k - T(w^k)\| = 0 \text{ a.s..}$$

By variational inequality system (A.6), we have that any cluster point of a realization sequence generated by RPDC almost surely is a saddle point of Lagrangian for (P).

□

### 4. Proof of Theorem 2 (Expected primal suboptimality and expected feasibility)

*Proof.*

(i) Let  $h(w, w') = \Lambda(w, w') + \frac{d_3}{d_1} \Lambda(w, w^*)$ . By statement (i) and (iii) in Lemma 1, we have  $h(w, w') \geq 0$ . From Lemma 2, we obtain that

$$\mathbb{E}_{i(k)} \frac{\epsilon}{N} [L(u^{k+1}, p) - L(u, q^k)] \leq \Lambda(w^k, w) - \mathbb{E}_{i(k)} \Lambda(w^{k+1}, w)$$

Taking expectation with respect to  $\mathcal{F}_t$ ,  $t > k$  for above inequality, we obtain that

$$\frac{\epsilon}{N} \mathbb{E}_{\mathcal{F}_t} [L(u^{k+1}, p) - L(u, q^k)] \leq \mathbb{E}_{\mathcal{F}_t} [\Lambda(w^k, w) - \Lambda(w^{k+1}, w)]. \quad (\text{A.25})$$

Take  $w = w^*$  in (A.25), we obtain

$$0 \leq \mathbb{E}_{\mathcal{F}_t} [\Lambda(w^k, w^*) - \Lambda(w^{k+1}, w^*)]. \quad (\text{A.26})$$

By the combination of (A.25) and (A.26), it follows

$$\frac{\epsilon}{N} \mathbb{E}_{\mathcal{F}_t} [L(u^{k+1}, p) - L(u, q^k)] \leq \mathbb{E}_{\mathcal{F}_t} [h(w^k, w) - h(w^{k+1}, w)] \quad (\text{A.27})$$

From the definition of  $\bar{u}_t$  and  $\bar{p}_t$ , we have  $\bar{u}_t \in \mathbf{U}$  and  $\bar{p}_t \in \mathbf{R}^m$ . From the convexity of set  $\mathbf{U}$ ,  $\mathbf{R}^m$  and the function  $L(u', p) - L(u, p')$  is convex in  $u'$  and linear in  $p'$ , for all  $u \in \mathbf{U}$  and  $p \in \mathbf{R}^m$ , we have that

$$\mathbb{E}_{\mathcal{F}_t} [L(\bar{u}_t, p) - L(u, \bar{p}_t)] \leq \mathbb{E}_{\mathcal{F}_t} \frac{1}{t+1} \sum_{k=0}^t [L(u^{k+1}, p) - L(u, q^k)] \leq \frac{Nh(w^0, w)}{\epsilon(t+1)}. \quad (\text{A.28})$$

(ii) If  $\mathbb{E}_{\mathcal{F}_t} \|A\bar{u}_t - b\| = 0$ , statement (ii) is obviously. Otherwise,  $\mathbb{E}_{\mathcal{F}_t} \|A\bar{u}_t - b\| \neq 0$  i.e., there is set  $\mathbb{W}$  such that  $\mathbb{P}\{\omega \in \mathbb{W} \mid \|A\bar{u}_t - b\| \neq 0\} > 0$ . Let  $\hat{p}$  be a random vector:

$$\hat{p}(\omega) = \begin{cases} 0 & \omega \notin \mathbb{W} \\ \frac{M(A\bar{u}_t - b)}{\|A\bar{u}_t - b\|} & \omega \in \mathbb{W}. \end{cases} \quad (\text{A.29})$$

Noted that for  $\omega \notin \mathbb{W}$ , we have  $\hat{p}(\omega) = 0$  and  $\|A\bar{u}_t - b\| = 0$ . Thus

$$\langle \hat{p}(\omega), A\bar{u}_t - b \rangle = M \|A\bar{u}_t - b\| = 0. \quad (\text{A.30})$$

Otherwise, for  $\omega \in \mathbb{W}$ , we have that

$$\langle \hat{p}(\omega), A\bar{u}_t - b \rangle = M \|A\bar{u}_t - b\|. \quad (\text{A.31})$$

Together (A.30) and (A.31), we have

$$\langle \hat{p}, A\bar{u}_t - b \rangle = M \|A\bar{u}_t - b\| \quad (\text{A.32})$$

Moreover, since  $Au^* = b$ , we have

$$L(\bar{u}_t, \hat{p}) - L(u^*, \bar{p}_t) = F(\bar{u}_t) + \langle \hat{p}, A\bar{u}_t - b \rangle - F(u^*) = F(\bar{u}_t) - F(u^*) + M \|A\bar{u}_t - b\|. \quad (\text{A.33})$$

Moreover, by taking  $u = \bar{u}_t$  in the right hand side of saddle point inequality, we have

$$F(\bar{u}_t) - F(u^*) \geq -\langle p^*, A\bar{u}_t - b \rangle \geq -\|p^*\| \|A\bar{u}_t - b\|. \quad (\text{A.34})$$

Combine (A.33) and (A.34), we have that

$$\|A\bar{u}_t - b\| \leq \frac{L(\bar{u}_t, \hat{p}) - L(u^*, \bar{p}_t)}{(M - \|p^*\|)}.$$

Take expectation on both side of above inequality, we have that

$$\begin{aligned} \mathbb{E}_{\mathcal{F}_t} \|A\bar{u}_t - b\| &\leq \frac{\mathbb{E}_{\mathcal{F}_t} [L(\bar{u}_t, \hat{p}) - L(u^*, \bar{p}_t)]}{(M - \|p^*\|)} \leq \mathbb{E}_{\mathcal{F}_t} \frac{Nh(w^0, (u^*, \hat{p}))}{(M - \|p^*\|) \epsilon(t+1)} && \text{(by (i))} \\ &\leq \mathbb{E}_{\mathcal{F}_t} \frac{Nd_5}{(M - \|p^*\|) \epsilon(t+1)} && (\text{A.35}) \end{aligned}$$

where  $d_5 = \sup_{\|p\| < M} h(w^0, (u^*, p))$ .

(iii) Again from (A.33), (A.34) and statement (ii), statement (iii) is coming. □

## 5. Proof of Lemma 3

*Proof.*

(i) This statement directly follows from the definition of  $\phi(w, w^*)$  and statement (i) in Lemma 1.

(ii) This statement directly follows from the definition of  $\phi(w, w^*)$  and statement (ii) in Lemma 1.

(iii) By the definition of  $\phi(w, w^*)$ , we have that.

$$\begin{aligned} &\phi(w^k, w^*) - \mathbb{E}_{i(k)} \phi(w^{k+1}, w^*) \\ &= \Lambda(w^k, w^*) - \mathbb{E}_{i(k)} \left\{ \Lambda(w^{k+1}, w^*) + \frac{\epsilon}{N} [L(u^k, p^*) - L(u^*, p^*)] - \frac{\epsilon}{N} [L(u^{k+1}, p^*) - L(u^*, p^*)] \right\} \\ &\geq \Lambda(w^k, w^*) - \mathbb{E}_{i(k)} \left\{ \Lambda(w^{k+1}, w^*) + \frac{\epsilon}{N} [L(u^k, p^*) - L(u^*, p^*)] - \frac{\epsilon}{N} [L(u^{k+1}, p^*) - L(u^*, q^k)] \right\} \\ &\geq d_4 [\|w^k - T(w^k)\|^2 + \frac{\epsilon}{N} [L(u^k, p^*) - L(u^*, p^*)]]. \end{aligned} \quad \begin{array}{l} \text{(by the definition of saddle point.)} \\ \text{(by Lemma 2)} \end{array}$$

□

## 6. Proof of Theorem 3 (Global strong metric subregularity of $H(w)$ implies linear convergence of RPDC)

*Proof.* Considering the reference point  $T(w^k)$  associated with given point  $w^k$ , we have that

$$\begin{cases} 0 \in \nabla G(u^k) + \partial J(T_u(w^k)) + A^\top q^k + \frac{1}{\epsilon} [\nabla K(T_u(w^k)) - \nabla K(u^k)] + \mathcal{N}_{\mathbf{U}}(T_u(w^k)) \\ 0 = b - AT_u(w^k) + \frac{1}{\gamma} [T_p(w^k) - p^k] \end{cases} \quad (\text{A.36})$$

Thus

$$v(T(w^k)) = \left( \begin{array}{c} \nabla G(T_u(w^k)) - \nabla G(u^k) + A^\top (T_p(w^k) - q^k) + \frac{1}{\epsilon} [\nabla K(u^k) - \nabla K(T_u(w^k))] \\ \frac{1}{\gamma} [p^k - T_p(w^k)] \end{array} \right) \in H(T(w^k)).$$

From Assumption 1 and 2, there is  $\delta > 0$  such that

$$\|v(T(w^k))\|^2 \leq \delta \|w^k - T(w^k)\|^2. \quad (\text{A.37})$$

Since  $H(w)$  is global strong metric subregular at  $w^*$  for 0, then

$$\|T(w^k) - w^*\| \leq c \text{dist}(0, H(T(w^k))) \leq c \|v(T(w^k))\| \leq c\sqrt{\delta} \|w^k - T(w^k)\|. \quad (\text{A.38})$$

Since  $\|w^k - w^*\| \leq \|T(w^k) - w^*\| + \|w^k - T(w^k)\|$ , we have

$$\|w^k - w^*\| \leq (c\sqrt{\delta} + 1) \|w^k - T(w^k)\|. \quad (\text{A.39})$$

From statement (iii) of Lemma 3, we have that

$$\begin{aligned} \phi(w^k, w^*) - \mathbb{E}_{i(k)} \phi(w^{k+1}, w^*) &\geq d_4 \|w^k - T(w^k)\|^2 + \frac{\epsilon}{N} [L(u^k, p^*) - L(u^*, p^*)] \\ &\geq \frac{d_4}{(c\sqrt{\delta} + 1)^2} \|w^k - w^*\|^2 + \frac{\epsilon}{N} [L(u^k, p^*) - L(u^*, p^*)] \quad (\text{by (A.39)}) \\ &\geq \delta' \{d_2 \|w^k - w^*\|^2 + \epsilon [L(u^k, p^*) - L(u^*, p^*)]\} \\ &\geq \delta' \phi(w^k, w^*). \quad (\text{by (i) of Lemma 3}) \end{aligned} \quad (\text{A.40})$$

where  $\delta' = \min\left\{\frac{d_4}{\max\{d_2(c\sqrt{\delta}+1)^2, d_4+1\}}, \frac{1}{N+1}\right\} < 1$ . It follows that

$$\mathbb{E}_{i(k)} \phi(w^{k+1}, w^*) \leq \alpha \phi(w^k, w^*). \quad (\text{A.41})$$

where  $\alpha = 1 - \delta' \in (0, 1)$ . Taking expectation with respect to  $\mathcal{F}_{k+1}$  for above inequality, we obtain that

$$\mathbb{E}_{\mathcal{F}_{k+1}} \phi(w^{k+1}, w^*) \leq \alpha^{k+1} \phi(w^0, w^*). \quad (\text{A.42})$$

□

## 7. Proof of Corollary 1 (R-linear rate of the sequence $\{\mathbb{E}_{\mathcal{F}_k} w^k\}$ )

*Proof.* By statement (i) in Lemma 3, we have that  $\phi(w, w^*) \geq d_1 \|w - w^*\|^2$ . By Theorem 3, we have that

$$\mathbb{E}_{\mathcal{F}_k} \phi(w^k, w^*) \leq \alpha^k \phi(w^0, w^*).$$

Then we have that

$$\mathbb{E}_{\mathcal{F}_k} \|w^k - w^*\|^2 \leq \frac{\alpha^k \phi(w^0, w^*)}{d_1}.$$

By convexity of  $\|\cdot\|^2$  and Jensen's inequality, we obtain that

$$\|\mathbb{E}_{\mathcal{F}_k} w^k - w^*\| \leq \hat{M} (\sqrt{\alpha})^k \quad \text{with } \hat{M} = \sqrt{\frac{\phi(w^0, w^*)}{d_1}}.$$

This shows that the sequence  $\{\mathbb{E}_{\mathcal{F}_k} w^k\}$  converges to the desired saddle point  $w^*$  at R-linear rate; i.e.,

$$\limsup_{k \rightarrow \infty} \sqrt[k]{\|\mathbb{E}_{\mathcal{F}_k} w^k - w^*\|} = \sqrt{\alpha} < 1.$$

□



## 8. Proof of Proposition 1

*Proof.* By the piecewise linear of  $H(w)$  and Zheng and Ng (Zheng & Ng, 2014), we have that  $H(w)$  is global metric subregular at  $w^*$  for 0. Since  $Q$  is positive-definite, then problem (SVM) has unique solution  $u^*$ . Hence, to show  $H(w)$  is global strongly metric subregular, we need to prove uniqueness of the Lagrangian multiplier for (SVM). Suppose there are two multipliers  $p$  and  $p'$ , thus we have

$$\begin{cases} 0 \in Qu^* - \mathbf{1}_n + py + \mathcal{N}_{[0,c]^n}(u^*) \\ 0 \in Qu^* - \mathbf{1}_n + p'y + \mathcal{N}_{[0,c]^n}(u^*) \end{cases}$$

Since there exists at least one component  $u_i^*$  of optimal solution  $u^*$  satisfies  $0 < u_i^* < c$ , then  $\xi_i = \mathcal{N}_{[0,c]}(u_i^*) = 0$ . Thus, we have that

$$\begin{cases} Q_i u^* - 1 + y_i p = 0 \\ Q_i u^* - 1 + y_i p' = 0 \end{cases} \quad (\text{A.43})$$

We conclude that  $p = p'$ . Therefore  $H(w)$  is global strongly metric subregular.  $\square$

## 9. Proof of Proposition 2

*Proof.* By the piecewise linear of  $H(w)$  and Zheng and Ng (Zheng & Ng, 2014), we have that  $H(w)$  is global metric subregular at  $w^*$  for 0. Since  $\Sigma$  is positive-definite, then problem (MLP) has unique solution  $u^*$ . Hence, to show  $H(w)$  is global strongly metric subregular, we need to prove uniqueness of the Lagrangian multiplier for (MLP). Suppose there are two pare of multipliers  $(p_1, p_2)$  and  $(p'_1, p'_2)$ , thus we have

$$\begin{cases} 0 \in \Sigma u^* + \lambda \partial \|u^*\|_1 + p_1 \mu + p_2 \mathbf{1}_n \\ 0 \in \Sigma u^* + \lambda \partial \|u^*\|_1 + p'_1 \mu + p'_2 \mathbf{1}_n \end{cases}$$

Since  $u_i^* \neq 0$ ,  $u_j^* \neq 0$ , thus  $\xi_i = \partial |u_i^*|$  and  $\xi_j = \partial |u_j^*|$  are single valued and we have

$$\begin{cases} \Sigma_i u^* + \lambda \xi_i + \mu_i p_1 + p_2 = 0 \\ \Sigma_i u^* + \lambda \xi_i + \mu_i p'_1 + p'_2 = 0 \end{cases} \quad (\text{A.44})$$

$$\begin{cases} \Sigma_j u^* + \lambda \xi_j + \mu_j p_1 + p_2 = 0 \\ \Sigma_j u^* + \lambda \xi_j + \mu_j p'_1 + p'_2 = 0 \end{cases} \quad (\text{A.45})$$

It follows that

$$\begin{cases} \mu_i (p_1 - p'_1) + p_2 - p'_2 = 0 \\ \mu_j (p_1 - p'_1) + p_2 - p'_2 = 0 \end{cases} \quad (\text{A.46})$$

Since  $\mu_i \neq \mu_j$ , we conclude that  $p_1 = p'_1$  and  $p_2 = p'_2$ . Therefore  $H(w)$  is global strongly metric subregular.  $\square$

## References

- Cohen, G. and Zhu, D. Decomposition and coordination methods in large scale optimization problems: The nondifferentiable case and the use of augmented lagrangians. *Adv. in Large Scale Systems*, 1:203–266, 1984.
- Robbins, H. and Siegmund, D. A convergence theorem for non negative almost supermartingales and some applications. In *Optimizing methods in statistics*, pp. 233–257. Elsevier, 1971.
- Zheng, X. Y. and Ng, K. F. Metric subregularity of piecewise linear multifunctions and applications to piecewise linear multiobjective optimization. *SIAM Journal on Optimization*, 24(1):154–174, 2014.
